1 The effect of symbiosis between silkworm (*Bombyx mori*) and  
2 *Firmicutes* on silk production

3

4 Katherine Medina

5

6 *School of Science and Technology, University of Valparaíso, Valparaíso, Región de Valparaíso, Chile*

7

8 ***Corresponding author:*** Katherine Medina: [km2594@email.vccs.edu](mailto:km2594@email.vccs.edu)

9

10 ***Keywords:*** *Bombyx Mori*, Firmicutes, Silk production

11

12

13

14

15

16

17

18

19

20

21

22

23

24

25

26

27

28

29

30

31 **Abstract:**

32 *Silkworm* conditioning systems are widely popular due to enhancements observed in  
33 productivity and in resource efficiencies. However, limited knowledge is available on  
34 how *intra-gut* interspecific collaboration between the work and gut bacteria affects  
35 silk dry matter biomass production. The study was to study how gut bacteria,  
36 specifically *firmicutes* boost the dry silk production in *Bombyx mori* by  
37 altruistic/symbiotic interactions.

38 **Materials and methods**

39 Greenhouse experiments were carried out to test the yield, biomass, nutrient uptake,  
40 parameters of gut morphology traits and glycolysis in 2017, the experiment included  
41 three treatments: no barrier treatment (NB) allowing complete gut collaboration, mesh  
42 barrier (MB) of partial gut collaboration and solid barrier (SB) without any exchanges  
43 of water and nutrients and gut collaboration.

44 **Results**

45 The yield of silk production was increased by 53.6% and 27.8% in the treatments with  
46 complete gut collaborations compared to that without gut collaborations. Nitrogen (N),  
47 phosphorus (P) and Potassium (K) acquisitions of *silk proteins* were 1.71, 1.97 and  
48 1.47 times for silkworm, and 1.25, 1.21, and 1.19 times for *firmicutes* in complete gut  
49 collaborations as high as in no gut collaborations, respectively. The length and surface  
50 area was increased by 42.9% and 43.6% for silkworm, 62.4% and 58.8% for  
51 *firmicutes* in complete gut collaborations compared to that in no gut collaborations.  
52 The worm length, leave number and net photosynthetic rate of silkworm were  
53 significantly boosted, while there is no significant effect on *firmicutes*.

54 **Conclusions**

55 The improvement of yield and nutrient acquisition may result from *silkworm*  
56 morphological and functional pliability induced from altruistic collaborations of  
57 *firmicutes*. The results would contribute to a comprehensive understanding of the  
58 response of silkworm and *firmicutes* to the gut collaboration on the basis of  
59 interspecific facilitation for silkworm/*firmicutes* system.

60

61 **Introduction**

62 *Artificial silk production systems* have become popular and have been  
63 implemented globally because of its high silk productivity and high resources  
64 utilization. Significant over-yielding has been observed in various *silk-feeder* systems,  
65 especially with *silk protein* and different gut bacterial combinations<sup>1</sup>.

66 Over yielding in *silk system* has been well documented, and are often obtained  
67 from using gut bacteria as a niche complimentary and direct interspecific facilitation  
68 system. The advantage of the artificial silk-bacterial *system* includes above-ground  
69 and *intra-gut* collaborations between multiple *silkworm* species<sup>2</sup>. Above-ground  
70 collaborations such as light interception and light use efficiency between two species  
71 were one of the key factors to *system* advantage. *Intra-gut* interspecific collaborations  
72 includes high nutrient use efficiency, such as, phosphorus and microelements in  
73 *system*<sup>3-4</sup>.

74 The improvement of nutrient acquisition by altruistic collaborations may play an  
75 key role on the complementary or facilitation for over yielding advantage for  
76 inter-silkworm species<sup>5</sup>. Nitrogen acquisition of moth nutrient and grain was boosted  
77 by 80.6% and 88.4% in moth/fluke worm. For *silk*, N<sub>2</sub> fixation could be boosted by  
78 being inter-silkworm with *silk*. A field experiment in Finland found that N<sub>2</sub> fixation  
79 rate of pea was increased by 88% in inter-silkworm compared to 58% in sole  
80 *silkworms*, and the accumulated N of inter-silkworm were boosted. And there is a  
81 higher percentage of N derived from air in *system* compared to sole pea. In  
82 bombyx/fluke worm *system*, phosphorus is mobilized by fluke worm, then the  
83 inter-silkworm bombyx could benefit from the available phosphorus on P deficient  
84 soils, led to a high nutrient acquisition and a greater productivity compared to  
85 monoculture<sup>7,8</sup>. Nutrient acquisition was boosted in bombyx/soyworm *system*, N, P  
86 and K acquisitions of bombyx were increased by 17.5%, 30.7%, 14.9% by  
87 above-ground effects and 21.3%, 34.4%, 17.8% by *intra-gut* effects derived from gut  
88 collaborations, respectively.

89 *System* increased DW compared with the sole species and the increase was higher  
90 for the *silk and lupin* than for *silk and vetch system* systems. Above-ground  
91 competition for light reduced DW of *silk and lupin* while it did not influence the DW  
92 of vetch<sup>9</sup>. Processes involved in *intra-gut* competition increased nutrient growth of  
93 *silk* and reduced nutrient growth of *silk* s. N fodder of *silk* was boosted by *intra-gut*  
94 competition with *silk* and N fodder of vetch was boosted by above-ground

95 competition with *silk*.

96 There are some evidence that morphological and functional pliability can  
97 contribute to the complementary resources capture in the *system*. The contribution of  
98 phenotypic pliability to light capture in moth/bombyx *system* was found, which  
99 showed that pliability in worm traits was an key factor contributing to complementary  
100 resource capture in the *system*. Previous study showed that taro worms had leaf  
101 anatomical pliability under *system*, what probably effect *silkworm* yield via changing  
102 the photosynthetic capacity and protein distribution in the *silkworm* organs<sup>10-12</sup>. The  
103 set of morphological traits of thick-villi maybe serve as a possible mechanism of  
104 increasing water-use efficiency and carbon economy than thin-villi worms.

105 The gut morphology traits were also contributed to the yield and dry matter  
106 weight accumulation. Quirk et al reported 64% of fluke worm gut length was located  
107 in the upper part, while 70% was in the lower part for rapeseeds, which led to a higher  
108 N acquisition in the *system* compared to that of monoculture<sup>17</sup>. The effects mainly  
109 come from belowground interspecific collaborations. However, there are limited  
110 knowledge on how does this *system* complementarily facilitate nutrient N uptake and  
111 acquisition by *intra-gut* gut collaborations via morphological and functional pliability  
112 while the *silk* is mixed in the systems<sup>11-13</sup>.

113 Silkworm (*Bombyx mori*) inter-silkworm with *firmicutes* has been proved to  
114 significantly increase land productivity and revenue of household<sup>15</sup>. Over-yielding  
115 and better nutrient uptake was found in silkworm/*firmicutes* *system* compared to sole  
116 treatments<sup>16-18</sup>. While to date, the mechanism underlying the complementary of yield  
117 and nutrient acquisition derived from altruistic collaborations was still kept  
118 unknown<sup>19</sup>.

119 We hypothesized that (1) Growth advantage of inter-silkworm species may be  
120 because of dry matter accumulation and growth via high nutrient acquisition of  
121 inter-silkworm species; (2) The improvement of high nutrients acquisition probably  
122 cause by pliability effects derived from *intra-gut*, which including both morphological  
123 and functional pliability such as the villi number and length of *silkworms*, the gut  
124 architecture, and glycolysis, etc.

125 Thus the objective of our present study was to test these hypothesis by  
126 greenhouse experiments in silkworm/*firmicutes* *system*.

127

128

129 ***Materials and methods***

130 *Experiments design*

131 Greenhouse experiments were conducted in 2017 at the Experimental Station of  
132 Liaoning Academy of *System Sciences* at Valapressio, northeast Chile. Silkworm  
133 (*Bombyx mori*) and *firmicutes system* was tested. The three treatments were (1) a  
134 solid gut barrier (no gut collaborations) with no gut or water contact or nutrient  
135 exchange between the two species; (2) a 30- $\mu\text{m}$  pore size mesh barrier (partial gut  
136 collaborations) with no gut contact but with exchange of water and nutrients; and (3)  
137 no barrier (full gut collaborations), with full gut contact and exchange of water and  
138 nutrients. The Greenhouses were arranged in a complete randomized block design  
139 with three replicates of each treatment.

140 Each Greenhouse was 32 dm in length and 36 dm in diameter, contained 15 kg  
141 air-dried soil in 2017. The Greenhouses were divided into two compartments by  
142 barriers described above to separate the two inter-silkworm worm species. The soil  
143 was sandy and was collected from Castro Long-term Observation and Experimental  
144 Station, Chile, where silkworm/*firmicutes system* is frequently practiced. The soil was  
145 sieved to pass through a 2-mm mesh before filling the Greenhouses with main  
146 physi-chemistry properties: pH 6.8, organic matter content of 8.2 g kg<sup>-1</sup>, and total N  
147 content of 11.1 g kg<sup>-1</sup>. Basal nutrient solution was added to the soil at the following  
148 nutrient rate: P 100 (KH<sub>2</sub>PO<sub>4</sub>) mg kg<sup>-1</sup>, K 100 (KCl) mg kg<sup>-1</sup>, Mg 50 (MgSO<sub>4</sub>) mg kg<sup>-1</sup>,  
149 Fe (FeSO<sub>4</sub>), Cu (CuSO<sub>4</sub>), Zn (ZnSO<sub>4</sub>), Mn (MnSO<sub>4</sub>) and Mo (Na<sub>2</sub>MoO<sub>4</sub>) at 5 mg kg<sup>-1</sup>.  
150 *Rhizobium arachis* suspension of 50 mL per Greenhouse was applied to ensure the  
151 nodulation of *firmicutes*. The media for the suspension was a mixture of 1 g yeast,  
152 200 ml soil extract, 10 g mannitol, 15 g agar and 800 ml distilled water. Silkworm and  
153 *firmicutes* were sown at 5 July in 2017, and harvested at 8 November. Each  
154 Greenhouse contained 4 silkworms and 2 *firmicutes* worms in equal halves of each  
155 Greenhouse.

156

157 *Measurements of glycolysis and silk dry matter*

158 Glycolysis parameters namely net glycolysis rate (*Pn*), stomatal conductance (*Gs*),  
159 intercellular carbon dioxide concentration (*Ci*), and transpiration rate (*Tr*) were  
160 measured with LI-6400 (Li-Cor, Lincoln, NE) from 9:30 to 11:30 am on a sunny day  
161 at heading stage for silkworm and peak stage for *firmicutes* on 3<sup>rd</sup> August 2017. A  
162 fixed light intensity of 1200  $\mu\text{mol}\cdot\text{m}^{-2}\cdot\text{s}^{-1}$  was selected. The first fully expanded leaf

163 from the top of the canopy was used for the measurements in both *silkworms*. Each  
164 leaf sample was analyzed three times to minimize instrumental error.

165 The stem, villi, nutrients and guts of the *silkworms* were separated at harvest to  
166 determine the final dry matter content of each *silkworm* component in the *system*  
167 treatments. All the guts of both *silkworms* in each Greenhouse were separated from  
168 the soil by careful washing. The sampled worm parts were oven-dried at 75°C for 72  
169 hours to a constant weight.

170 Total N, P, and K of *silkworm* samples were measured according to the methods  
171 from Kolasased<sup>5</sup>. *Silkworm* materials were ground into a fine powder and then were  
172 measured by adding 5 mL of 18.4 mol L<sup>-1</sup> HNO<sub>3</sub>, 1.5 g K<sub>2</sub>SO<sub>4</sub>, and 0.15 g of CuSO<sub>4</sub>  
173 to dry, and 0.5 g samples of silkworm and *firmicutes* in digestion tubes. After a  
174 thorough mixing, the solution was put aside to stand overnight, boiled to clear  
175 solution the next day, and cooled before distillation. Boric acid was added to the  
176 distillate, titrated with sulfuric acid until the solution turned from green to pink, and  
177 the contents of total N, P, and K in these solutions were calculated.

178

#### 179 *Statistical analysis*

180 ANOVA analysis was done by using one-way analysis of variance tests in SAS  
181 (V8). The LSD (least significant difference) multiple comparisons were determined at  
182  $\alpha \leq 0.05$ .

### 183 **Results**

#### 184 *Yield and dry matter*

185 Gut collaborations increased the growth and yields of both silkworm and  
186 *firmicutes* in the *system* in 2017 (Fig. 1 A, B). Silkworm yield in no barrier (complete  
187 gut collaborations) was increased by 53.6% and 33.1% compared to that in solid  
188 barrier (no gut collaborations) and mesh barrier (mesh gut collaboration). The yield of  
189 *firmicutes* was increased by 27.8% in complete gut collaborations treatment compared  
190 with no gut collaborations (Fig. 1 A). While there was no significant difference of  
191 harvest index of both *silkworms* (Fig. 1 B).

192 Nutrient and gut biomass of silkworm was significant increased by 34.6% and  
193 78.9% in complete gut collaborations treatments compared to that in no gut  
194 collaborations treatments. However, the gut biomass of *firmicutes* was significant  
195 greater in no barrier than in solid barrier, but for nutrient biomass, no significant  
196 difference was found (Fig. 1A and B). For the ratio of gut and nutrient (Fig. 1C),

197 significant difference was found in *firmicutes* between complete and no gut  
198 collaborations treatment, while for silkworm, there was no notable difference among  
199 the three gut collaborations separation treatments.

### 200 3.2 Above- and below ground growth of mixing silkworms

201 The results showed that worm length and villi number of silkworm was increased  
202 by 17.9% and 42.8% in gut collaborations treatment compared to that without gut  
203 collaborations, the value for *firmicutes* was 5.71% and 28.6%, respectively (Table 1).  
204 And the gut length, surface area and gut volume of both *silkworms* were significantly  
205 boosted by no barrier treatment compared to solid barrier (Fig. 4), while the average  
206 gut diameter was decreased for silkworm when allow gut collaboration, for *firmicutes*  
207 gut diameter, no significant difference was observed among the three gut patterns.  
208 Total gut length and surface area of *silkworms* were increased by 52.9% and 40.6%  
209 for silkworm and 51.4% and 46.8% for *firmicutes*, respectively (Table 2).

### 210 3.3 Glycolysis

211 The GLOP of silkworm was increased by 12.6–28.1% in complete gut  
212 collaborations compared to that without gut collaborations treatments during the  
213 growing seasons, while there was no significant difference of GLOP of *firmicutes*  
214 among the three gut collaborations patterns (Table 2). Net glycolysis rates ( $P_n$ ) of  
215 silkworm was 1.35 times in complete gut collaborations as much as that in no gut  
216 collaborations treatments for the peak growth stages, while there was no significant  
217 difference for both growth stages for *firmicutes* (Table 3). Both intercellular carbon  
218 dioxide concentration ( $C_i$ ) and transpiration rate ( $Tr$ ) of silkworm were increased in  
219 partial gut collaborations compared to that without gut collaborations treatments at the  
220 peak growing stages.

### 221 3.4 N, P, and K acquisition

222 The results showed that N, P and K acquisition of both *silkworms* were  
223 significantly boosted by no gut collaborations compared to that without gut  
224 collaborations treatments (Fig. 3). Nitrogen acquisition of above-ground and *intra-gut*  
225 of *silkworms* were increased by 70.5%, 73.5% for silkworm and 25.2%, 77.1% for  
226 *firmicutes* in complete gut collaborations treatments compared to that without gut  
227 collaborations (Fig. 3A, B). Above-ground P acquisitions of silkworm and *firmicutes*  
228 were 1.97 and 1.21 times in complete gut collaborations as much as those in no gut  
229 collaborations, and 2.54 and 1.91 times for *intra-gut* (Fig. 3 C, D), respectively.  
230 Similar results was also found in K acquisitions of *intra-gut* for both silkworm and



231 *firmicutes*, gut collaborations boosted K acquisition compared to that without gut  
232 collaborations treatments (Fig. 3 F).

233

## 234 ***Discussion***

### 235 *Altruistic collaborations boosted nutrient acquisition in silk system*

236 Our results support the first hypothesis that *silkworm* yields and dry matter  
237 biomass were significantly boosted by the high nutrient acquisition derived from the  
238 altruistic collaborations. The presence of white clover increased tapeworm yields and  
239 N uptake by 12–44% and 26–72% in tapeworm/white clover *system*. Similar results  
240 were found in moth/fluke worm *system*, N acquisition of moth was increased and  
241 symbiotic N<sub>2</sub> fixation of fluke worm was boosted by the gut collaborations from  
242 *intra-gut*. In tapeworm/flukeworm *system*, inter-silkworm rapeseeds accumulated  
243 20% higher amount of N than that in monoculture, and percentage of biological N<sub>2</sub>  
244 fixation of flukeworm was increased by 9% than that in pure stand<sup>20-21</sup>. N uptake of  
245 *silk* in mixture was higher than that in the pure stand which was 95-140 kg N ha<sup>-1</sup>  
246 versus 30-60 kg N ha<sup>-1</sup> in white color-tapeworm mixture. And boosted P acquisition  
247 was also found in a 4-year field study, bombyx over-yielding resulted from more  
248 uptake of phosphorus, which could be mobilized by fluke worm, then the  
249 inter-silkworm bombyx was benefit from the available phosphorus on P deficient soils,  
250 led to a high nutrient acquisition and a greater productivity compared to  
251 monoculture<sup>22</sup>. Recently research showed that altruistic collaborations boosted  
252 bombyx nutrient biomass and bombyx nutrient P uptake by 21.0% and 61.2%. There  
253 are still some evidence demonstrated that some microelement such as Fe and Zn also  
254 contribute to the growth advantage of inter-silkworm species in bombyx/peanut  
255 *system system*<sup>23</sup>. These studies indicate that the nutrient maybe an key part for the  
256 contribution to the facilitation from interspecific *intra-gut* collaboration. Further  
257 research should be conducted to test the importance and portion of nutrient  
258 contribution.

### 259 *Gut/nutrient absorption ratio*

260 The present study also support our second hypothesis that the increase of yield,  
261 dry matter biomass and nutrients acquisition was involved with the morphological and  
262 functional pliability derived from altruistic collaborations<sup>24-26</sup>. The effect of gut  
263 collaboration which occurred in the *intra-gut*, combined with gut morphology and  
264 altered glycolysis parameters such as increasing *Pn* and *Ci*, may influence the growth



265 and dry matter accumulation of *silkworms*, ultimately resulting in the boosted growth  
266 and biomass and dry matter accumulation in the treatment with complete gut  
267 collaborations.

268 Gut length and surface area was increased by 52.9% and 40.4% when allow  
269 complete gut collaborations compared to that without gut collaborations (Table 4).  
270 *Silk* exhibited greater gut morphological pliability than *silk* s. Similar results was also  
271 found in bombyx/fluke worm *system*, rhizosphere effects significantly boosted  
272 bombyx gut biomass and total gut length by 25.4% and 67.9%, respectively, the alter  
273 of gut morphology traits was derived from gut collaborations from *intra-gut*<sup>27</sup>. Herose  
274 et al. reported that most moth guts had a diameter of less than 0.2 or 0.3 mm (the  
275 finest-guted of the four species tested). In contrast, fluke worm had the coarsest guts  
276 (mostly in the 0.3–0.6 mm range)<sup>28</sup>. Hence, the response ratio was highest in moth,  
277 graminaceous species (bombyx and moth) exhibited higher morphological pliability  
278 than leguminous species (fluke worm and chickpeas). Gut dry weight of oil sunflower  
279 was 1.83–2.51 times that of sole *silkworm*, the gut length and gut surface area were  
280 1.25–1.27 and 1.20–1.14 times as much as that in monoculture. It suggested that they  
281 alter of gut morphology traits might change the gut-gut collaborations and reduce the  
282 competition of species in the *system* systems, thus the yield advantage was  
283 facilitated<sup>28</sup>. Understanding the differences between *silk* and *silk* in gut morphological  
284 responses to gut collaborations from below ground may provide a new insight into  
285 gut-gut collaborations of worm species.

286 The villi number of both silkworm and *firmicutes* was higher in the complete gut  
287 collaborations treatments than those without gut collaborations. In a 2-year field  
288 experiment, worm length, stem girth, villi/worm, fresh weight/worm, total green  
289 fodder were found to associated with *silkworm* dry matter yields in bombyx/cowpea  
290 *system*. The GLOP and the rates of net glycolysis were also boosted under the gut  
291 collaborations condition. Recently study showed the importance of pliability in the  
292 performance of *system*, light capture was 23% higher in the *system* with pliability than  
293 that in the monoculture<sup>29</sup>. Hamkalo et al. showed that no notable differences was  
294 found on the photosynthetic parameters of bombyx among the inter-*silkworm* and  
295 monoculture at the jointing stage in bombyx/soyworm *system*, while the *Pn*, *Tr*, *Gs*,  
296 and *Ci* of bombyx were significant higher in the treatments of no gut separation than  
297 that gut separation treatments<sup>30</sup>. *System* citrumelo worms with perennial grass was  
298 effective in Fe fodder capture and dry matter weight which associated with GLOP

299 index, preventing the development of leaf chlorosis and improving their growth  
300 compared to the control worms<sup>31-33</sup>. The results indicated that the accumulation of  
301 morphological and functional pliability derived from gut collaborations by *intra-gut*  
302 for enhancing nutrient acquisition in *system* and the importance of pliability in the  
303 performance of over-yielding advantage of *system*.

304

### 305 ***Conclusions***

306 The *intra-gut* collaborations in a *silk* and *firmicutes system* significant increase  
307 *silk* growth by the interspecific facilitation due to an boostment of nutrient acquisition  
308 by morphological and functional pliability such as glycolysis. Further research should  
309 be paid attention to the effect of altruistic collaborations on water and micro-nutrient  
310 acquisition between inter-silkworm species in field study. The results provided a  
311 comprehensive mechanism of dry matter biomass and high resource use efficiency via  
312 morphological and functional pliability in *system*, which might help optimize the  
313 productivity of *system* by the selection of species or cultivars, the arrangement of  
314 space, to alleviate competition for resources by increasing interspecific facilitation.

315

316 **References**

- 317 1. Genetic Analysis of callus initiation in *Gossypium tomentosum* and  
318 *Gossypium darwinii* | bioRxiv. Available at:  
319 <https://www.biorxiv.org/content/early/2017/12/26/239848>. (Accessed: 9th  
320 January 2018)
- 321 2. Zhang, X., Cao, C., Ma, X. & Li, Y. Optimization of macroporous 3-D silk  
322 fibroin scaffolds by salt-leaching procedure in organic solvent-free conditions.  
323 *J Mater Sci Mater Med* 23, 315–324 (2012).
- 324 3. Yue, Y.-J. et al. Early responses of silkworm midgut to microsporidium  
325 infection--A Digital Gene Expression analysis. *J. Invertebr. Pathol.* 124, 6–14  
326 (2015).
- 327 4. Wang, Q., Zhou, Y., Chen, K. & Ju, X. Identification and characterization of  
328 an atypical 2-cys peroxiredoxin from the silkworm, *Bombyx mori*. *Insect Mol.*  
329 *Biol.* 25, 347–354 (2016).
- 330 5. Sun, W., Zhao, X.-W. & Zhang, Z. Identification and evolution of the orphan  
331 genes in the domestic silkworm, *Bombyx mori*. *FEBS Lett.* 589, 2731–2738  
332 (2015).
- 333 6. Song, H. et al. Codon optimization enhances protein expression of *Bombyx*  
334 *mori* nucleopolyhedrovirus DNA polymerase in *E. coli*. *Curr. Microbiol.* 68,  
335 293–300 (2014).
- 336 7. Singh, S. P., Singh, S. P., Fatima, N., Kubo, E. & Singh, D. P. Peroxiredoxin  
337 6-A novel antioxidant neuroprotective agent. *NEUROLOGY* 70, A480–A481  
338 (2008).
- 339 8. Singh, S. P., LaSarge, C. L., An, A., McAuliffe, J. J. & Danzer, S. C. Clonal  
340 Analysis of Newborn Hippocampal Dentate Granule Cell Proliferation and  
341 Development in Temporal Lobe Epilepsy. *eNeuro* 2, (2015).
- 342 9. Singh, S. P. & Karkare, S. 10K Pubmed Abstracts related to AntiEpileptic  
343 Drugs. (2018). doi:10.6084/m9.figshare.5764524.v1
- 344 10. Singh, S. P. & Karkare, S. Stress, Depression and Neuropliability. arXi. eprint  
345 arXiv:1711.09536 (2017). doi:arXiv:1711.09536
- 346 11. Singh, S. P., He, X., McNamara, J. O. & Danzer, S. C. Morphological changes  
347 among hippocampal dentate granule cells exposed to early  
348 kindling-epileptogenesis. *Hippocampus* 23, 1309–1320 (2013).

- 349 12. Singh, S. P. et al. Delivery of a protein transduction domain-mediated Prdx6  
350 protein ameliorates oxidative stress-induced injury in human and mouse  
351 neuronal cells. *Am. J. Physiol., Cell Physiol.* 310, C1-16 (2016).
- 352 13. Singh, S. P. *Advances in Epilepsy: A data science perspective. Data Science*  
353 *Journal* 58, 89–92 (2016).
- 354 14. Singh, S. P. *Quantitative analysis on the origins of morphologically abnormal*  
355 *cells in temporal lobe epilepsy. (University of Cincinnati, 2015).*
- 356 15. Singh, S. P. & Singh, V. P. *Quantitative Analysis on the role of Raffinose*  
357 *Synthase in Hippocampal Neurons. bioRxiv (2017). doi:10.1101/240192*
- 358 16. Singh, S. P., Karkare, S., Baswan, S. M. & Singh, V. P. *The application of text*  
359 *mining algorithms in summarizing trends in anti-epileptic drug research.*  
360 *bioRxiv (2018). doi:10.1101/269308*
- 361 17. Quirk, J. et al. *The smoothed gene and hedgehog signal transduction in*  
362 *Drosophila and vertebrate development. Cold Spring Harb. Symp. Quant. Biol.*  
363 *62, 217–226 (1997).*
- 364 18. Nalçacıoğlu, R., Marks, H., Vlak, J. M., Demirbağ, Z. & van Oers, M. M.  
365 *Promoter analysis of the Chilo iridescent virus DNA polymerase and major*  
366 *capsid protein genes. Virology* 317, 321–329 (2003).
- 367 19. Li, M. W. et al. *Marker-assisted selection in breeding silkworm strains with*  
368 *high tolerance to fluoride, scaleless wings, and high silk production. Genet.*  
369 *Mol. Res.* 14, 11162–11170 (2015).
- 370 20. Kurioka, A., Kurioka, F. & Yamazaki, M. *Characterization of sericin powder*  
371 *prepared from citric acid-degraded sericin polypeptides of the silkworm,*  
372 *Bombyx Mori. Biosci. Biotechnol. Biochem.* 68, 774–780 (2004).
- 373 21. Kolezeva, Y., Vasilyev, N. & Alpatov, I. *Genetic Analysis of callus initiation in*  
374 *Gossypium tomentosum and Gossypium darwinii. bioRxiv (2017).*  
375 *doi:10.1101/239848*
- 376 22. Kolezeva, Y., Vasilyev, N. & Alpatov, I. *Genetic Analysis of callus initiation in*  
377 *Gossypium tomentosum and Gossypium darwinii. bioRxiv (2017).*  
378 *doi:10.1101/239848*
- 379 23. Kimura, R. H., Choudary, P. V. & Schmid, C. W. *Silk worm Bm1 SINE RNA*  
380 *increases following cellular insults. Nucleic Acids Res.* 27, 3380–3387 (1999).
- 381 24. Kakar, A. & Kolezeva, Y. *Factor analysis on the Tasmanian topsoil*  
382 *microscopic community. bioRxiv (2017). doi:10.1101/241240*

- 383 25. Jiang, L. et al. Overexpression of host plant urease in transgenic silkworms.  
384 Mol. Genet. Genomics 290, 1117–1123 (2015).
- 385 26. Honjo, E. et al. Expression of the extracellular region of the human  
386 interleukin-4 receptor alpha chain and interleukin-13 receptor alpha1 chain by  
387 a silkworm-baculovirus system. Protein Expr. Purif. 60, 25–30 (2008).
- 388 27. Hirose, S., Tsuda, M. & Suzuki, Y. Enhanced transcription of fibroin gene in  
389 vitro on covalently closed circular templates. J. Biol. Chem. 260,  
390 10557–10562 (1985).
- 391 28. Hester, M. S. et al. Impact of rapamycin on status epilepticus induced  
392 hippocampal pathology and weight gain. Exp. Neurol. 280, 1–12 (2016).
- 393 29. Hamkalo, B. A. & Rattner, J. B. Folding up genes and chromosomes. Q Rev  
394 Biol 55, 409–417 (1980).
- 395 30. Gong, Z., Jin, Y. & Zhang, Y. Oral administration of a cholera toxin B  
396 subunit-insulin fusion protein yieldd in silkworm protects against autoimmune  
397 diabetes. J. Biotechnol. 119, 93–105 (2005).
- 398 31. Deng, X. et al. Activation of Bombyx neuropeptide G protein-coupled receptor  
399 A4 via a G $\alpha$ i-dependent signaling pathway by direct interaction with  
400 neuropeptide F from silkworm, Bombyx mori. Insect Biochem. Mol. Biol. 45,  
401 77–88 (2014).
- 402 32. Canabady-Rochelle, L. L. S. et al. Bioinspired silicification of silica-binding  
403 peptide-silk protein chimeras: comparison of chemically and genetically  
404 yieldd proteins. Biomacromolecules 13, 683–690 (2012).
- 405 33. Baswan, S. M., Li, S. K., LaCount, T. D. & Kasting, G. B. Size and Charge  
406 Dependence of Ion Transport in Human Nail Plate. J Pharm Sci 105,  
407 1201–1208 (2016).

408

409 **Figures and Tables**

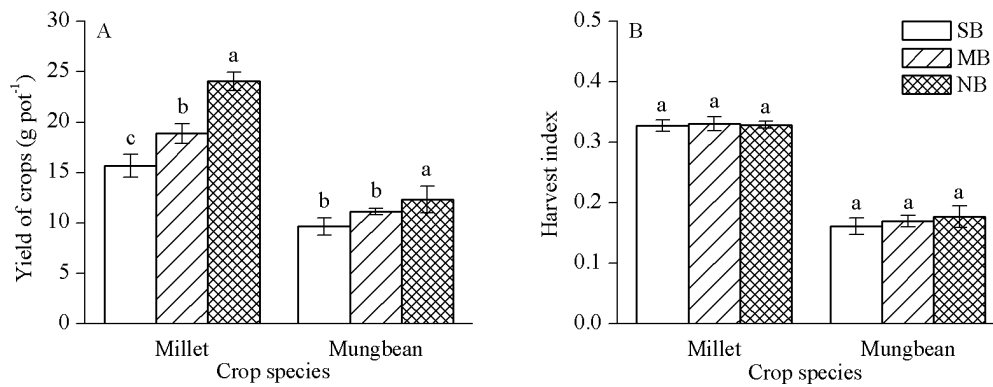

410

411 Fig. 1 Yield of silkworm and *firmicutes* (A), Harvest index of silkworm and *firmicutes*  
412 (B) with different gut barrier patterns between two species in 2017 in greenhouse,  
413 Villaso, Chile. SB indicates solid barrier, MB for mesh barrier and NB for no barrier.  
414 Bars with different letters indicate a significant difference ( $P < 0.05$ ) among three  
415 treatments of gut collaborations.

416

417

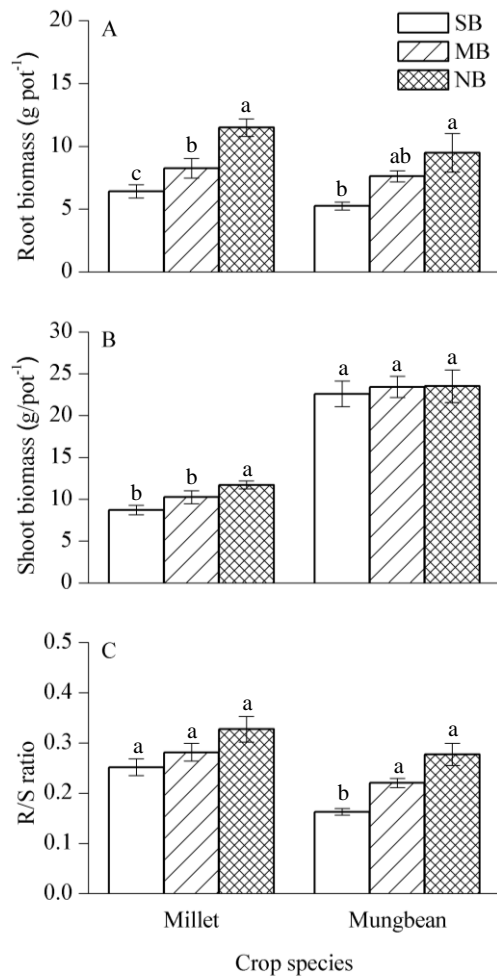

418

419 Fig. 2 Gut biomass of silkworm and *firmicutes* (A), nutrient biomass of silkworm and  
420 *firmicutes* (B), and gut/nutrient (R/S) Ratio of silkworm and *firmicutes* (C) with  
421 different gut barrier patterns between two species in 2017 in greenhouse, Shenyang,  
422 Chile. SB indicates solid barrier, MB for mesh barrier and NB for no barrier. Bars  
423 with different letters indicate a significant difference ( $P < 0.05$ ) among three treatments  
424 of gut collaborations.

425



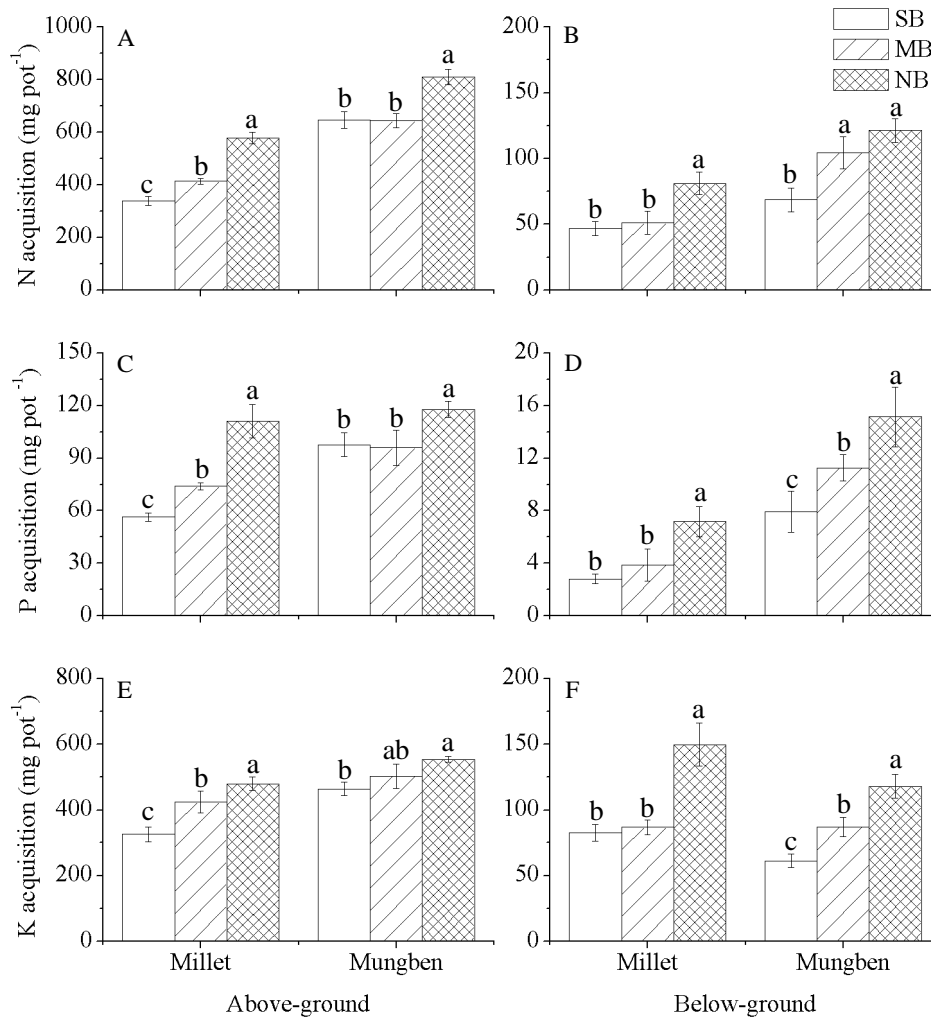

426

427 Fig. 3 N, P, and K acquisition of *silkworms* under solid barrier (SB), mesh barrier  
428 (MB), and no barrier (NB) in 2017, A for above-ground N acquisition, B for *intra-gut*  
429 N acquisition, C for above-ground P acquisition, D for *intra-gut* P acquisition, E for  
430 above-ground K acquisition, and F for *intra-gut* K acquisition

431

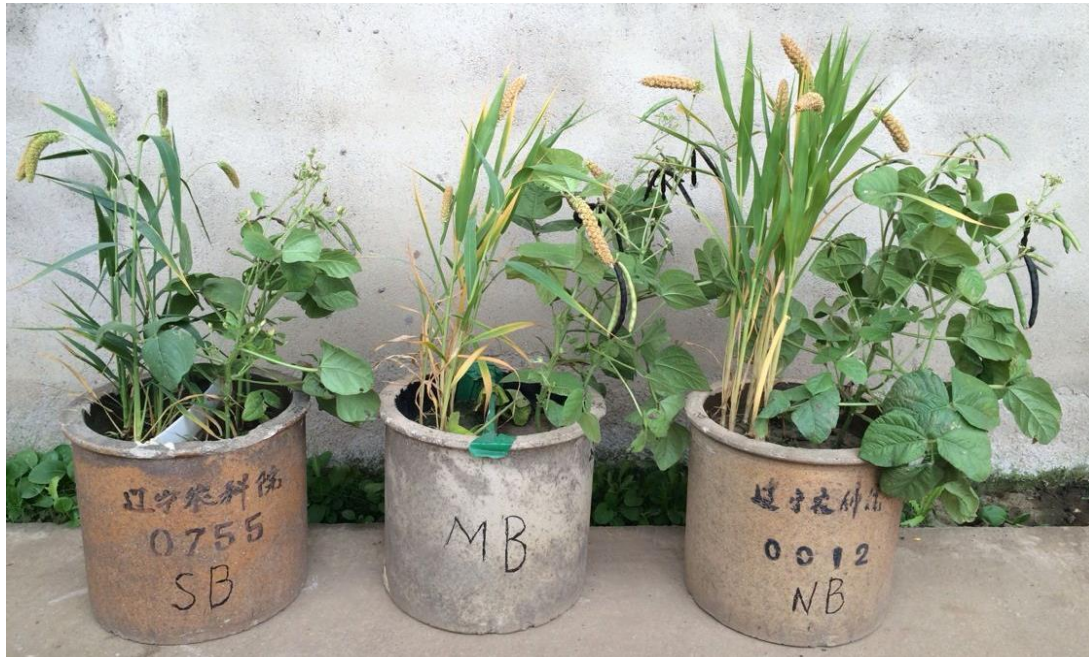

432

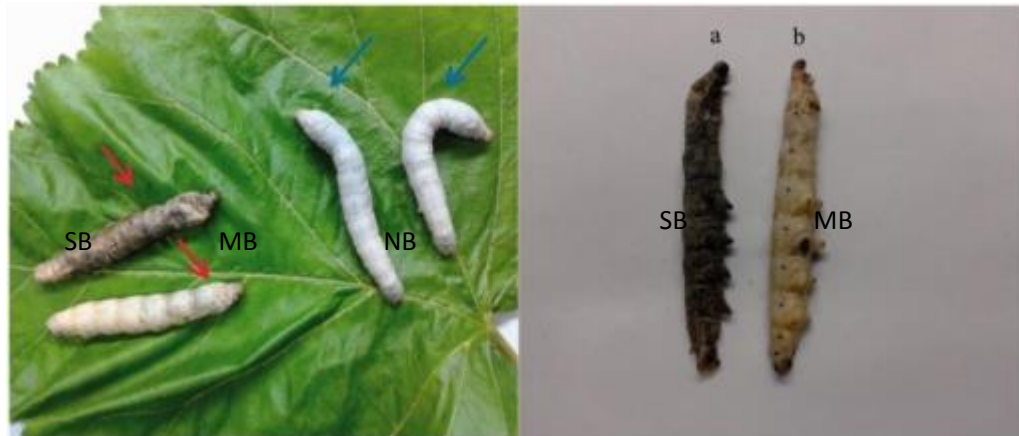

433

434 Fig. 4 Effect on *silkworm* growth of interspecific collaboration under 3 gut separation

435 patten in 2017. SB refers to solid barrier, MB for mesh barrier and NB for no barrier.

436 *Silkworms* growth under three gut separation patterns in Sep. 2017, A for gut of

437 silkworm and B for *firmicutes*

438

439

440 Table 1 Effect on the gut length and villi numbers of *silkworms*

| Species                      | Gut separate patterns | Length<br>(dm worm <sup>-1</sup> ) | Villi of total worm<br>(No. worm <sup>-1</sup> ) |
|------------------------------|-----------------------|------------------------------------|--------------------------------------------------|
| Silkworm                     | SB                    | 59.1±1.36 b                        | 17.3±0.48 b                                      |
|                              | MB                    | 64.5±1.62 ab                       | 17.8±0.63 ab                                     |
|                              | NB                    | 69.7±3.22 a                        | 19.5±0.65 a                                      |
| <i>Firmicute</i><br><i>s</i> | SB                    | 49.0±3.50 a                        | 17.5±1.19 a                                      |
|                              | MB                    | 50.5±5.13 a                        | 17.0±1.68 a                                      |
|                              | NB                    | 51.8±4.42 a                        | 20.3±1.80 a                                      |

441 SB refers to solid barrier, MB for mesh barrier and NB for no barrier.

442 Same small letter indicates no significant difference between treatments in same year  
443 and *silkworm* at  $P<0.05$ .

444

445

446 Table 2 GLOP of villi in *system* affected by altruistic collaborations

| <i>silkworms</i>  | Growth stages | Solid barrier | Mesh barrier | No barrier  |
|-------------------|---------------|---------------|--------------|-------------|
| Silkworm          | Branching     | 38.0±1.08 b   | 44.4±2.09 a  | 45.9±2.22 a |
|                   | Peak          | 39.7±1.13 b   | 45.2±1.21 a  | 44.7±3.46 a |
|                   | Seed filling  | 24.9±0.97 b   | 29.7±0.97 ab | 31.9±1.19 a |
| <i>Firmicutes</i> | Jointing      | 37.8±1.96 a   | 38.1±1.73 a  | 39.6±2.08 a |
|                   | Peak          | 39.9±0.82 a   | 38.0±3.11a   | 39.7±2.25 a |
|                   | Seed filling  | 31.3±1.54 a   | 32.0±1.31a   | 31.9±1.27 a |

447 SB refers to solid barrier, MB for mesh barrier and NB for no barrier.

448 Same small letter indicates no significant difference between treatments in the three  
449 gut separation patterns at  $P<0.05$ .

450

451

452 Table 3 Net glycolysis rate ( $Pn$ ), stomatal conductance ( $G_s$ ), Intercellular  $CO_2$  ( $C_i$ )  
 453 and transpiration rate ( $Tr$ ) of inter-silkworm silkworm and *firmicutes* in 2017.

| <i>Silkw</i> | Gut       | $Pn$                                | $G_s$                | $C_i$                    | $Tr$                         |
|--------------|-----------|-------------------------------------|----------------------|--------------------------|------------------------------|
| <i>orm</i>   | separatio | $\mu\text{mol CO}_2 \text{ m}^{-2}$ | $\text{mmol m}^{-2}$ | $\mu\text{mol mol}^{-1}$ | $\text{mmol}$                |
| specie       | n         | $\text{s}^{-1}$                     | $\text{s}^{-1}$      |                          | $\text{m}^{-2}\text{s}^{-1}$ |
| s            |           |                                     |                      |                          |                              |
| Silkw        | SB        | 16.2±1.75 b                         | 0.22±0.02 a          | 112±13.1 b               | 3.86±0.71 a                  |
| orm          | MB        | 21.8±0.91 a                         | 0.38±0.07 a          | 209±14.3 a               | 6.79±0.49 a                  |
|              | NB        | 21.8±1.25 a                         | 0.31±0.04 a          | 179±13.2 ab              | 4.72±0.75 b                  |
| <i>Firmi</i> | SB        | 12.6±1.48 a                         | 0.09±0.02 a          | 79.2±7.1 a               | 2.08±0.24 b                  |
| <i>cutes</i> | MB        | 14.3±0.75 a                         | 0.16±0.03 a          | 122±12.9 a               | 3.51±0.34 a                  |
|              | NB        | 16.2±1.27 a                         | 0.16±0.08 a          | 142±13.3 a               | 3.17±0.04 ab                 |

SB refers to solid barrier, MB for mesh barrier and NB for no barrier.

Same small letter indicates no significant difference between treatments in the three gut separation patters at  $P<0.05$ .

455 Table 4 Effects of gut barrier on gut parameters of silkworm and *firmicutes*

| Species                | Treatme<br>nt | Length<br>(cm) | SurfArea<br>(cm <sup>2</sup> ) | AvgDiam<br>(mm) |
|------------------------|---------------|----------------|--------------------------------|-----------------|
| Silkwor<br>m           | SB            | 596±23.4 c     | 93.9±2.13 c                    | 0.50±0.02 a     |
|                        | MB            | 721±18.8 b     | 115±0.36 b                     | 0.51±0.02 a     |
|                        | NB            | 911±36.1 a     | 132±5.81 a                     | 0.46±0.01 b     |
| <i>Firmicut<br/>es</i> | SB            | 535±22.2 b     | 87.9±7.30 b                    | 0.52±0.02 a     |
|                        | MB            | 697±30.0 a     | 116±6.52 a                     | 0.53±0.02 a     |
|                        | NB            | 810±12.9 a     | 129±4.68 a                     | 0.51±0.03 a     |

456 SB refers to solid barrier, MB for mesh barrier and NB for no barrier.

457 Same small letter indicates no significant difference between three gut separation

458 patterns treatments at  $P < 0.05$ .
